# Supplementary material
Source: MDPI journal article supplement (https://www.mdpi.com/2076-3417/13/1/489)
Supplement: s1 [file s1]

## **Supporting Information**

# **Synthesis of Hydrophobic Poly( $\gamma$ -glutamic acid) Derivatives by Enzymatic Grafting of Partially 2-Deoxygenated Amyloses**

Tomoya Anai, Shogo Abe, Kousei Shobu, Jun-ichi Kadokawa\*

*Graduate School of Science and Engineering, Kagoshima University, 1-21-40 Korimoto, Kagoshima 890-0065, Japan*

\* E-mail : [kadokawa@eng.kagoshima-u.ac.jp](mailto:kadokawa@eng.kagoshima-u.ac.jp) ; Tel.: +81-99-285-7743

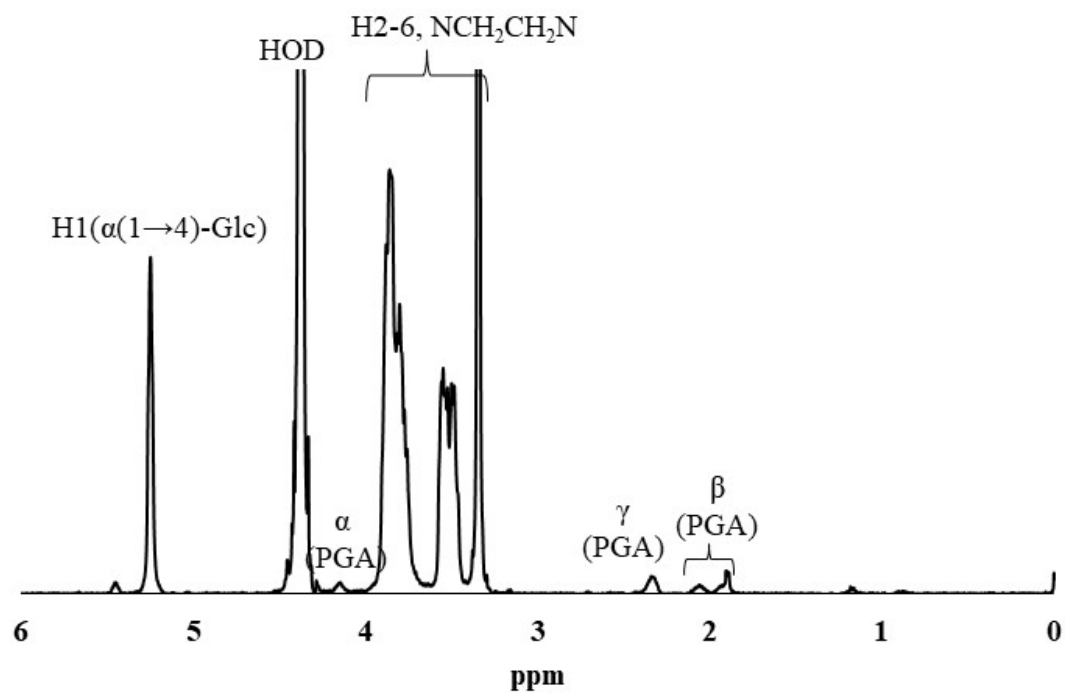

**Figure S1.** <sup>1</sup>H NMR spectrum of amylose-grafted PGA in NaOD/D<sub>2</sub>O (entry 1 in Table 1).

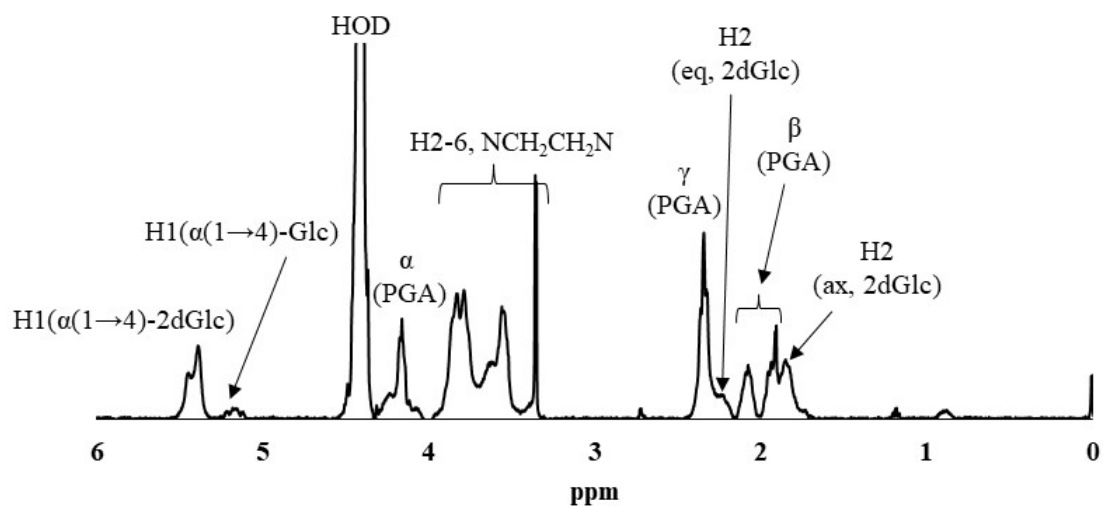

**Figure S2.** <sup>1</sup>H NMR spectrum of 2-deoxyamylose-grafted PGA in NaOD/D<sub>2</sub>O (entry 6 in Table 1).
